# Supplementary material
Source: PubMed Central journal article supplement (PMC6175639)
Supplement: NIHMS986571-supplement-Figure_1.pdf [file NIHMS986571-supplement-Figure_1.pdf]

**WT****TS5KO**

Replicate Tissue Pools

Replicate Tissue Pools

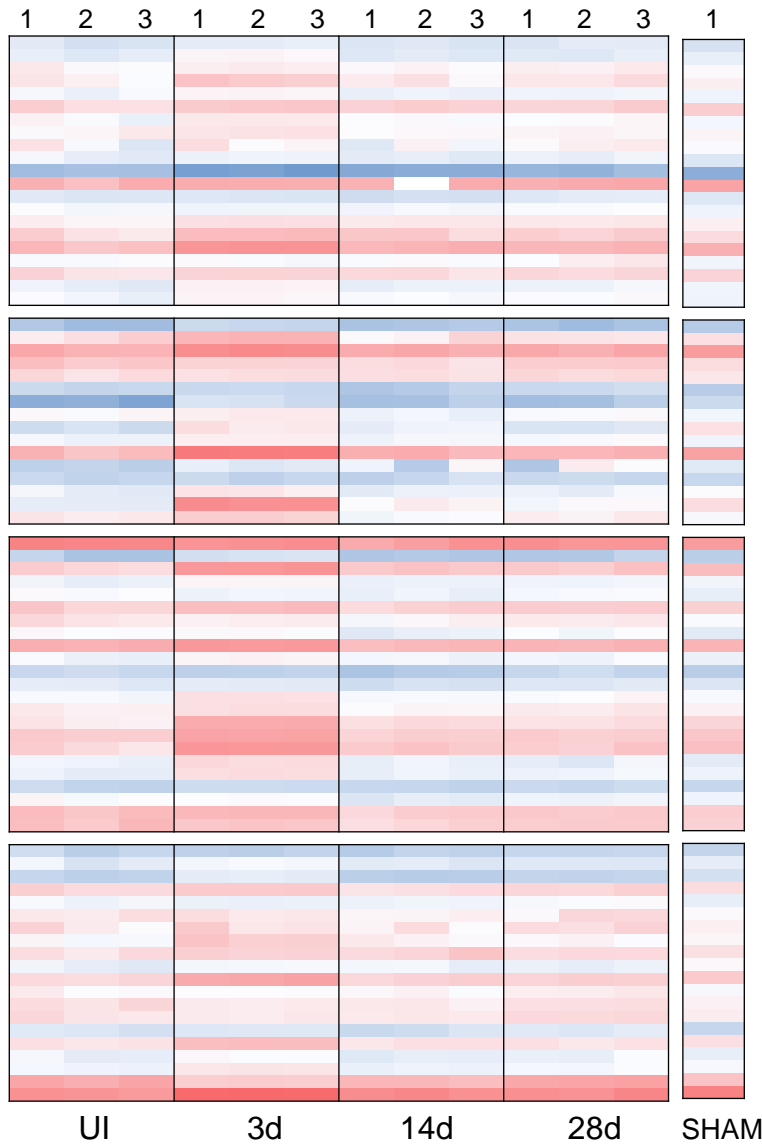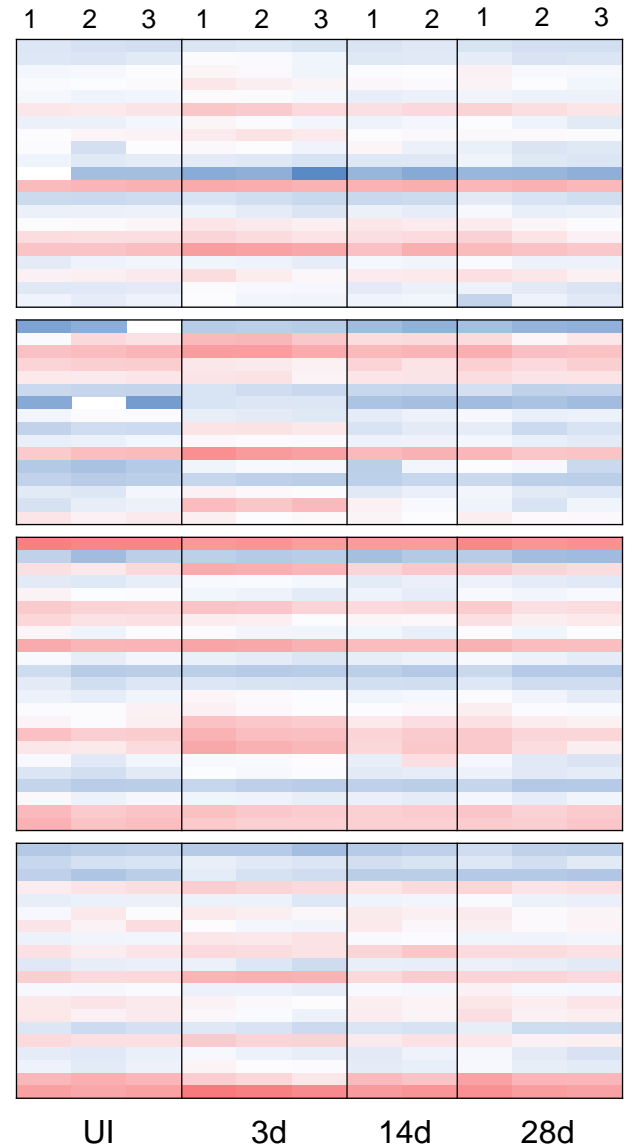

Low (0.25)

mRNA abundance

High (2000)

**Supplemental Figure 1:** Expression ( $\Delta Ct$ ) of 84 hypoxia responsive genes in WT and TS5KO tendons before (UI) or after injection of TGF- $\beta$ 1 (3d, 14d, and 28d). Genes are separated based on function: HIF1A Signaling, Angiogenesis, Glycolytic Metabolism, and Cell Fate (gene order can be seen in Supplemental Table 2). Three replicate tissue pools were analyzed for each experimental group with the exception of TS5KO at 14 days due to lack of amplification of any genes in this cDNA preparation (see Supplemental Table 1 for details). Blank spaces indicate no amplification of qt-PCR signal for that gene in a given sample.
