# Supplementary material
Source: PubMed Central journal article supplement (PMC6175639)
Supplement: NIHMS986571-supplement-Table_1.pdf [file NIHMS986571-supplement-Table_1.pdf]

Supplemental Table 1: Experimental Groups and Outcomes

| Group           |                                                      | Abbreviation                      | Outcome Measures       |       |                     |                   |                          |       |                           |       |                      |          |
|-----------------|------------------------------------------------------|-----------------------------------|------------------------|-------|---------------------|-------------------|--------------------------|-------|---------------------------|-------|----------------------|----------|
|                 |                                                      |                                   | Histology <sup>1</sup> |       | qt-PCR <sup>2</sup> |                   | Alamar Blue <sup>3</sup> |       | Biomechanics <sup>3</sup> |       | Lactate <sup>4</sup> |          |
|                 |                                                      |                                   | WT                     | TS5KO | WT                  | TS5KO             | WT                       | TS5KO | WT                        | TS5KO | WT                   | TS5KO    |
| <i>In-Vivo</i>  | Un-Injured                                           | UI                                | N=4                    | N=4   | N=3<br>(12,20,22)   | N=3<br>(20,18,20) | -                        | -     | -                         | -     | -                    | -        |
|                 | 3 days                                               | 3d                                | N=4                    | N=2   | N=3 (12<br>each)    | N=3<br>(13,10,10) | -                        | -     | -                         | -     | -                    | -        |
|                 | 14 days                                              | 14d                               | N=2                    | N=3   | N=3<br>(20,20,21)   | N=3<br>(20,18)*   | -                        | -     | -                         | -     | -                    | -        |
|                 | 28 days                                              | 28d                               | N=3                    | N=4   | N=3<br>(18,16,18)   | N=3<br>(18,15,15) | -                        | -     | -                         | -     | -                    | -        |
|                 | Sham                                                 | Sham                              | -                      | -     | N=1 (24)            | -                 | -                        | -     | -                         | -     | -                    | -        |
| <i>In-Vitro</i> | Freshly Excised                                      | FE                                | N=3                    | N=4   | N=1 (22)            | N=1 (20)          | N=3                      | N=3   | N=6                       | N=6   | N=2 (22)             | N=2 (20) |
|                 | 20% O <sub>2</sub>                                   | Basal                             | N=3                    | N=3   | N=1 (13)            | N=1 (13)          | N=3                      | N=3   | N=6                       | N=6   | N=2 (13)             | N=2 (13) |
|                 | 20% O <sub>2</sub> + TGF-β <sub>1</sub>              | +TGF-β <sub>1</sub>               | N=3                    | N=3   | N=1 (16)            | N=1 (18)          | N=3                      | N=3   | N=6                       | N=6   | N=2 (16)             | N=2 (18) |
|                 | 2.5% O <sub>2</sub>                                  | 2.5% O <sub>2</sub>               | N=3                    | N=3   | N=1 (16)            | N=1 (18)          | N=3                      | N=3   | N=5                       | N=5   | N=2 (16)             | N=2 (18) |
|                 | 20% O <sub>2</sub> +TGF-β <sub>1</sub><br>+LY2109761 | +TGF-β <sub>1</sub><br>+LY2109761 | N=3                    | N=3   | N=1 (21)            | N=1 (15)          | N=3                      | N=3   | -                         | -     | N=2 (21)             | N=2 (15) |
|                 | 2.5% O <sub>2</sub> +LY2109761                       | 2.5% O <sub>2</sub><br>+LY2109761 | N=3                    | N=3   | N=1 (16)            | N=1 (17)          | N=3                      | N=3   | -                         | -     | N=2 (16)             | N=2 (17) |

Footnote 1 - Individual legs (*in-vivo*) or tendons (*in-vitro*)

2 - Tissue pools with number of tendons per pool in parenthesis

3 - Individual Tendons

4 - Number of media samples measured with total number of tendons used per group in parenthesis

\* 3<sup>rd</sup> pool removed from post-analysis due to outlier (Abundance values for all genes approximately 1.5 standard deviations below the average)
